# Supplementary material
Source: Springer Nature journal article supplement (https://www.springermedizin.de/resource/supplementary/12943_2014_1387_MOESM9_ESM.pdf/9552862)

Asra-EPS

VAESBJ

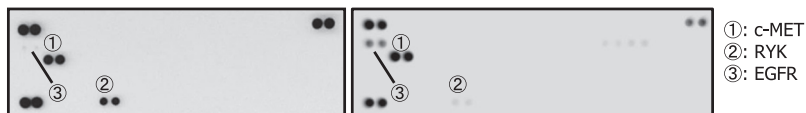**B**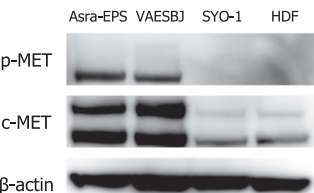**C**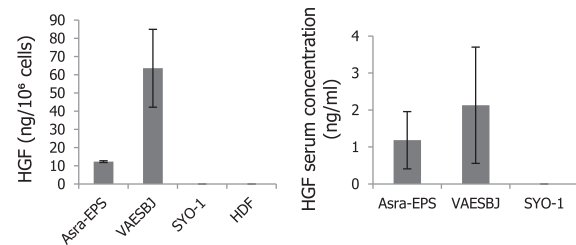**D**

Asra-EPS

VAESBJ

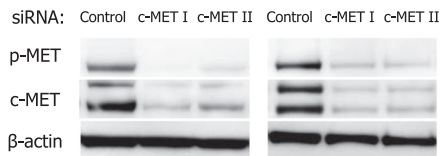**E**

Asra-EPS

VAESBJ

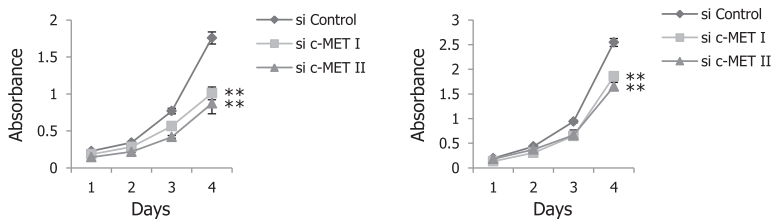**F**

Asra-EPS

VAESBJ

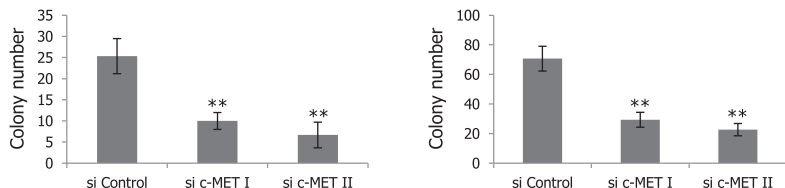

Supplement: MOESM9 [file 9552862]
